# Supplementary material for: Potential of Wormwood and Oak Bark-Based Supplement in Health Improvement of Nosema ceranae-Infected Honey Bees
Source: MDPI journal article supplement (doi:10.3390/ani14081195), 2024-04-16

| Day | Group | Abacin | Hymenoptecin | Defensin | Apidecin | Vitelogenin |
|-----|-------|--------|--------------|----------|----------|-------------|
| 6   | I     | MAX    | MAX          | MIN      | MAX      | MAX         |
|     | S     | MAX    | MIN          | MIN      | MIN      | MAX         |
|     | I-S1  | MAX    | MIN          | MIN      | MIN      | MAX         |
|     | I-S3  | MIN    | MIN          | MIN      | MIN      | MAX         |
| 9   | I     | MAX    | MAX          | MAX      | MAX      | MAX         |
|     | S     | MIN    | MAX          | MIN      | MAX      | MIN         |
|     | I-S1  | MAX    | MAX          | MAX      | MAX      | MAX         |
|     | I-S3  | MAX    | MAX          | MAX      | MAX      | MIN         |
|     | I-S6  | MIN    | MAX          | MAX      | MAX      | MIN         |
| 15  | I     | MAX    | MIN          | MAX      | MAX      | MAX         |
|     | S     | MAX    | MAX          | MIN      | MAX      | MAX         |
|     | I-S1  | MAX    | MAX          | MAX      | MAX      | MAX         |
|     | I-S3  | MAX    | MAX          | MAX      | MAX      | MAX         |
|     | I-S6  | MAX    | MAX          | MAX      | MAX      | MAX         |

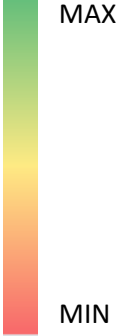

Supplement: s1 [file s1]
